# Supplementary material
Source: Springer Nature journal article supplement (https://www.springermedizin.de/resource/supplementary/12883_2010_460_MOESM1_ESM.pdf/9455476)
Supplement: MOESM1 [file 9455476]

| <i>PSQ Item</i>                                                                                                                                    | <i>Domains Assessed</i>       | <i>Responses</i>                                                                                                       | <i>Score</i>                               |
|----------------------------------------------------------------------------------------------------------------------------------------------------|-------------------------------|------------------------------------------------------------------------------------------------------------------------|--------------------------------------------|
| PSQ1: What was the overall quality of your sleep during the past week?                                                                             | Sleep Qualityz                | Excellent (I slept well without Waking and awoke fresh)                                                                | 1                                          |
|                                                                                                                                                    |                               | Reasonable (I slept moderately well; I awoke rarely and went back to sleep without difficulty; I awoke feeling fine)   | 2                                          |
|                                                                                                                                                    |                               | Poor (I slept poorly and awoke frequently; I lay awake a lot of the night; I awoke feeling tired)                      | 3                                          |
| PSQ2: Over the last week, how would you rate your ability to function during the day?                                                              | Daytime Functioning           | Excellent (I was alert and able to focus well on my daily activities)                                                  | 1                                          |
|                                                                                                                                                    |                               | Good (I completed my daily activities with reasonable focus)                                                           | 2                                          |
|                                                                                                                                                    |                               | Moderate (I accomplished most of what I had planned for the day, but felt drowsy and unable to focus well on my tasks) | 3                                          |
|                                                                                                                                                    |                               | Poor (I was tired all day and felt like taking a nap or took at least 1 nap)                                           | 4                                          |
| PSQ3: How often did you have RLS symptoms at night during the past week?                                                                           | Nights with RLS symptoms      | _____ nights                                                                                                           | 0 to 7                                     |
| <i>If you did not have RLS symptoms on any night during the past week (your response to question 3 was 0), then skip questions 4 and 5 below</i>   |                               |                                                                                                                        | Score PSQ4 and PSQ5 as 0; 'No RLS symptom' |
| PSQ4: On those nights during the last week when you experienced RLS symptoms, how often did you wake during the night because of the RLS symptoms? | RLS-related Sleep Disturbance | 0 times                                                                                                                | 1                                          |
|                                                                                                                                                    |                               | 1-2 times                                                                                                              | 2                                          |
|                                                                                                                                                    |                               | 3-4 times                                                                                                              | 3                                          |
|                                                                                                                                                    |                               | 5 or more times                                                                                                        | 4                                          |
| PSQ5: On those nights when you experienced RLS symptoms, how long were you awake during the night because of the RLS symptoms?                     | RLS-related Sleep Latency     | Did not wake-up                                                                                                        | 1                                          |
|                                                                                                                                                    |                               | Less than 1 hour                                                                                                       | 2                                          |
|                                                                                                                                                    |                               | 1 hour to less than 2 hours                                                                                            | 3                                          |
|                                                                                                                                                    |                               | 2 hours to less than 3 hours                                                                                           | 4                                          |
|                                                                                                                                                    |                               | 3 or more hours                                                                                                        | 5                                          |
